# Supplementary material for: Novel donor–acceptor type conjugated polymers based on quinoxalino[6,5-f]quinoxaline for photovoltaic applications
Source: Royal Society of Chemistry journal article supplement (doi:10.1039/c6qm00130k), 2016-08-31

## Supplementary Information

### Novel Donor-Acceptor Type Conjugated Polymers Based on Quinoxalino[6,5-f]quinoxaline for Photovoltaic Application

Liqian Liu, Guichuan Zhang, Baitian He, Shengjian Liu, Chunhui Duan and Fei Huang<sup>a</sup>

<sup>a</sup>Institute of Polymer Optoelectronic Materials & Devices, State Key Laboratory of Luminescent Materials and Devices, South China University of Technology, Guangzhou 510640, P. R. China. E-mail: msfhuang@scut.edu.cn

Figure S1. J-V curve of P2:PC<sub>71</sub>BM based device with 2%DIO.

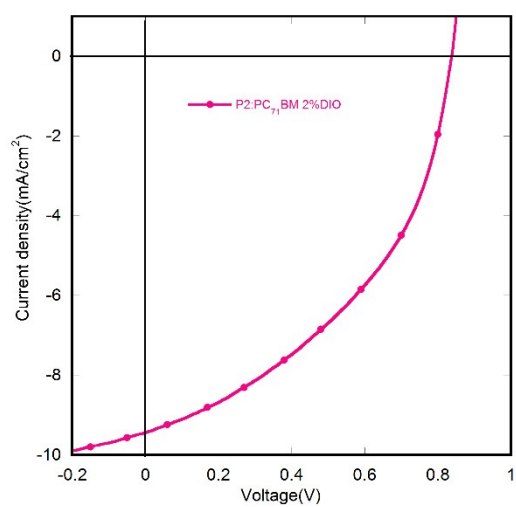

Figure S2. EQE spectra of P2:PC<sub>71</sub>BM based device with 2%DIO.

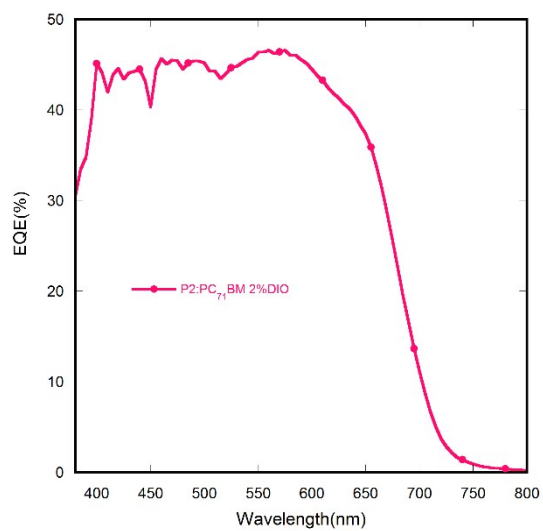

Supplement: c6qm00130k1.pdf [file c6qm00130k1.pdf]
